# Supplementary material
Source: PubMed Central journal article supplement (PMC4137971)

Supplementary figure. Flow chart of how analytic populations were sampled from the full NHANES survey populations. Analytic populations were limited to men, aged 20 years or older, who participated in morning examinations at the mobile examination center (MEC), and were white, black, or Mexican American.

### NHANES participants included in analysis

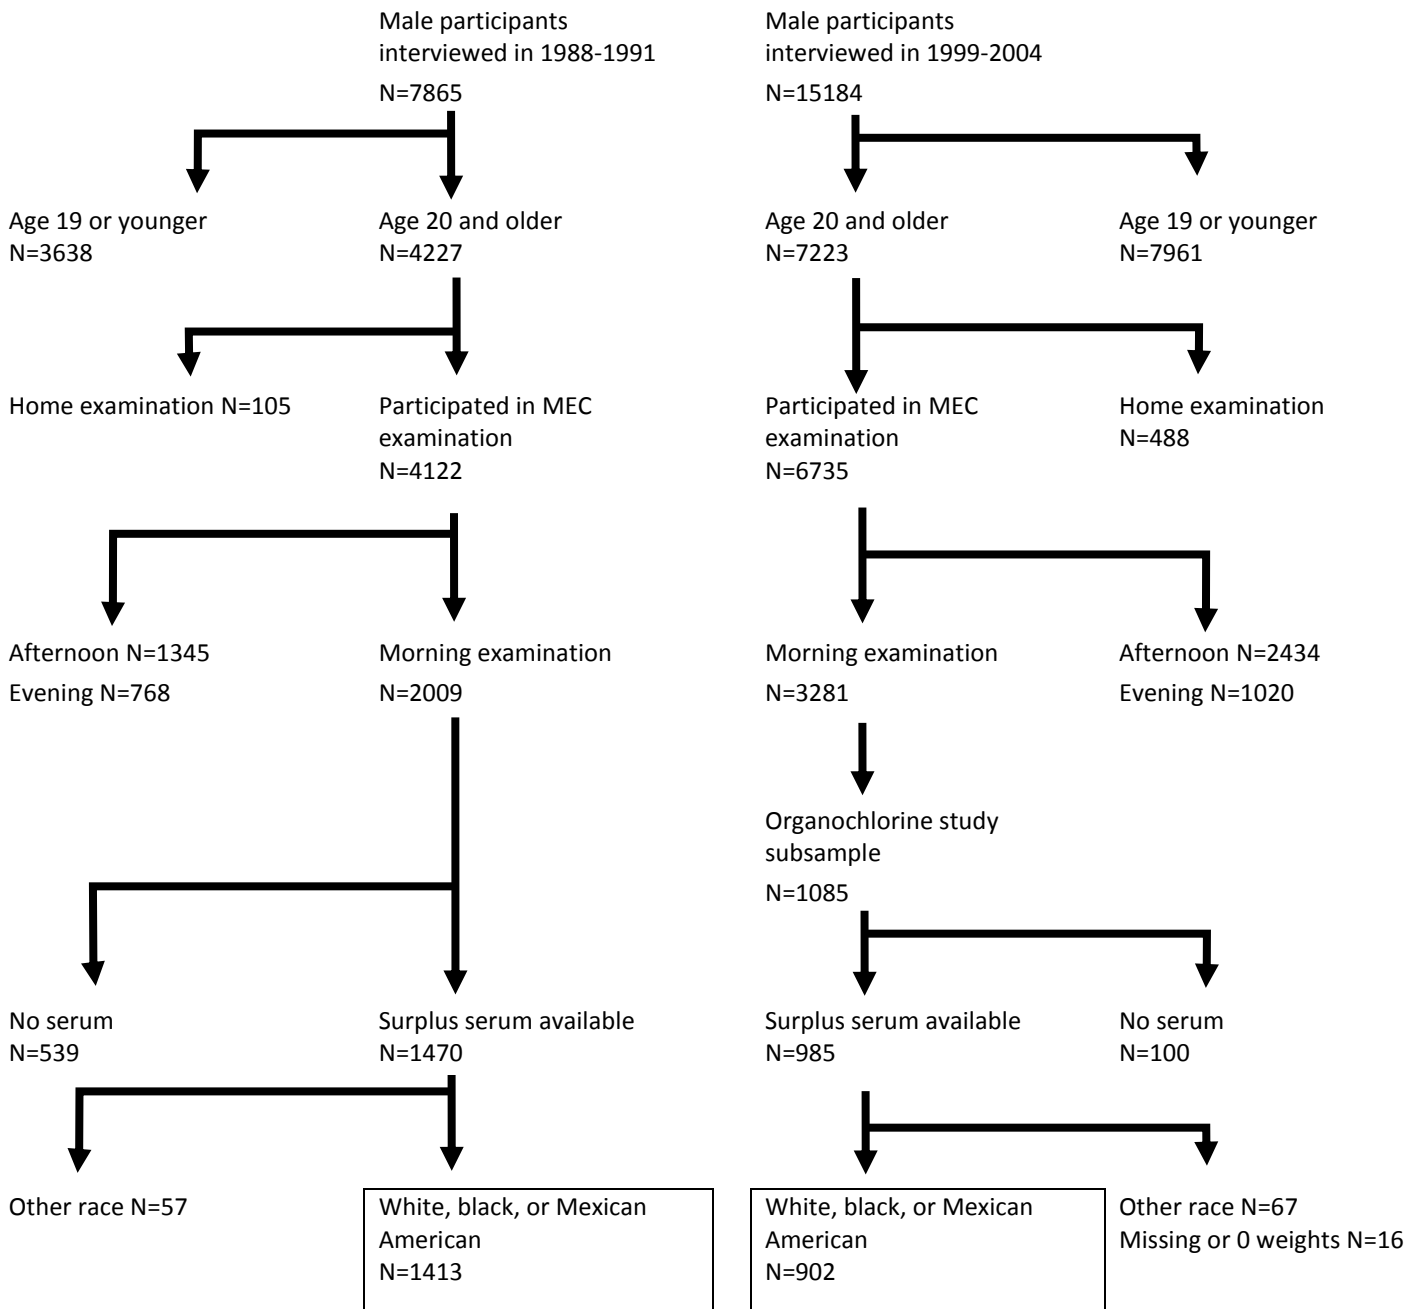

Supplement: NIHMS615615-supplement-Supplementary_figure.pdf [file NIHMS615615-supplement-Supplementary_figure.pdf]
