# Supplementary material
Source: PubMed Central journal article supplement (PMC4137971)
Supplement: NIHMS615615-supplement-Supplementary_tables.pdf [file NIHMS615615-supplement-Supplementary_tables.pdf]

Supplementary table 1. Difference in mean hormone concentrations with adjustment for age and race/ethnicity only, comparing NHANES 1988-1991 to 1999-2004.

|                            | 1988-1991         |                     | 1999-2004         |                     | Difference | P-value |
|----------------------------|-------------------|---------------------|-------------------|---------------------|------------|---------|
|                            | Mean <sup>a</sup> | 95% CI <sup>b</sup> | Mean <sup>a</sup> | 95% CI <sup>b</sup> |            |         |
| Testosterone (ng/mL)       | 5.47              | 5.31, 5.64          | 5.08              | 4.90, 5.25          | -0.40      | <0.01   |
| Free testosterone (ng/mL)  | 0.100             | 0.096, 0.104        | 0.094             | 0.089, 0.098        | -0.006     | 0.02    |
| SHBG (nmol/L)              | 35.68             | 34.18, 37.25        | 32.00             | 30.47, 33.61        | -3.68      | <0.01   |
| 3 $\alpha$ -diol-G (ng/mL) | 11.87             | 11.26, 12.51        | 10.25             | 9.78, 10.73         | -1.62      | <0.01   |
| Estradiol (pg/mL)          | 35.59             | 34.13, 37.12        | 30.02             | 28.53, 31.58        | -5.58      | <0.01   |

<sup>a</sup> adjusted for age (1-year intervals) and race/ethnicity

<sup>b</sup> CI – confidence interval

Supplementary table 2. Difference in mean hormone concentrations by age group with adjustment for age and race/ethnicity only, comparing NHANES 1988-1991 to 1999-2004.

|                            | Age years | 1988-1991         |                     | 1999-2004         |                     | Difference | P-value |
|----------------------------|-----------|-------------------|---------------------|-------------------|---------------------|------------|---------|
|                            |           | Mean <sup>a</sup> | 95% CI <sup>b</sup> | Mean <sup>a</sup> | 95% CI <sup>b</sup> |            |         |
| Testosterone (ng/mL)       | 20-44     | 5.42              | 5.13, 5.72          | 4.93              | 4.60, 5.25          | -0.49      | <0.01   |
|                            | 45-69     | 5.47              | 5.21, 5.74          | 5.18              | 4.86, 5.49          | -0.29      | 0.07    |
|                            | 70+       | 5.76              | 5.18, 6.34          | 5.63              | 5.02, 6.24          | -0.13      | 0.47    |
| Free testosterone (ng/mL)  | 20-44     | 0.101             | 0.095, 0.107        | 0.098             | 0.093, 0.104        | -0.003     | 0.37    |
|                            | 45-69     | 0.101             | 0.092, 0.111        | 0.092             | 0.085, 0.099        | -0.009     | 0.05    |
|                            | 70+       | 0.088             | 0.076, 0.102        | 0.075             | 0.061, 0.092        | -0.013     | 0.07    |
| SHBG (nmol/L)              | 20-44     | 35.37             | 32.82, 38.11        | 29.41             | 27.04, 31.98        | -5.96      | <0.01   |
|                            | 45-69     | 34.61             | 31.78, 37.69        | 34.00             | 30.86, 37.45        | -0.62      | 0.67    |
|                            | 70+       | 41.24             | 34.50, 49.29        | 42.21             | 35.42, 50.30        | 0.97       | 0.65    |
| 3 $\alpha$ -diol-G (ng/mL) | 20-44     | 12.07             | 11.20, 13.01        | 9.67              | 8.98, 10.40         | -2.40      | <0.01   |
|                            | 45-69     | 11.42             | 10.26, 12.70        | 10.86             | 9.93, 11.88         | -0.56      | 0.38    |
|                            | 70+       | 12.03             | 9.93, 14.57         | 11.30             | 9.47, 13.49         | -0.73      | 0.40    |
| Estradiol (pg/mL)          | 20-44     | 35.23             | 33.27, 37.31        | 29.42             | 27.40, 31.59        | -5.81      | <0.01   |
|                            | 45-69     | 35.60             | 32.56, 38.92        | 31.08             | 28.68, 33.68        | -4.51      | <0.01   |
|                            | 70+       | 37.99             | 33.49, 43.10        | 29.24             | 25.02, 34.18        | -8.75      | <0.01   |

<sup>a</sup> adjusted for age (1-year intervals) and race/ethnicity

<sup>b</sup> CI – confidence interval

Supplementary table 3. Difference in mean hormone concentrations by race/ethnicity with adjustment for age only, comparing NHANES 1988-1991 to 1999-2004.

|                            | Race/ethnicity   | 1988-1991         |                     | 1999-2004         |                     | Difference | P-value |
|----------------------------|------------------|-------------------|---------------------|-------------------|---------------------|------------|---------|
|                            |                  | Mean <sup>a</sup> | 95% CI <sup>b</sup> | Mean <sup>a</sup> | 95% CI <sup>b</sup> |            |         |
| Testosterone (ng/mL)       | White            | 5.45              | 5.27, 5.64          | 4.96              | 4.75, 5.17          | -0.49      | <0.01   |
|                            | Black            | 5.71              | 5.40, 6.03          | 5.99              | 5.58, 6.40          | 0.27       | 0.28    |
|                            | Mexican-American | 5.30              | 5.16, 5.44          | 4.98              | 4.63, 5.33          | -0.32      | 0.09    |
| Free testosterone (ng/mL)  | White            | 0.100             | 0.095, 0.104        | 0.092             | 0.087, 0.097        | -0.007     | 0.01    |
|                            | Black            | 0.100             | 0.092, 0.108        | 0.106             | 0.097, 0.115        | 0.006      | 0.28    |
|                            | Mexican-American | 0.099             | 0.095, 0.102        | 0.093             | 0.087, 0.100        | -0.006     | 0.10    |
| SHBG (nmol/L)              | White            | 35.66             | 33.99, 37.42        | 31.45             | 29.72, 33.28        | -4.21      | <0.01   |
|                            | Black            | 37.17             | 35.53, 38.89        | 35.61             | 32.65, 38.84        | -1.57      | 0.38    |
|                            | Mexican-American | 33.31             | 31.71, 35.00        | 32.63             | 29.79, 35.74        | -0.68      | 0.68    |
| 3 $\alpha$ -diol-G (ng/mL) | White            | 12.16             | 11.45, 12.92        | 10.33             | 9.76, 10.92         | -1.84      | <0.01   |
|                            | Black            | 10.32             | 9.54, 11.16         | 9.98              | 9.35, 10.65         | -0.34      | 0.51    |
|                            | Mexican-American | 10.91             | 10.20, 11.66        | 9.57              | 8.91, 10.29         | -1.33      | 0.01    |
| Estradiol (pg/mL)          | White            | 35.21             | 33.49, 37.01        | 29.36             | 27.66, 31.16        | -5.85      | <0.01   |
|                            | Black            | 40.73             | 39.04, 42.49        | 38.65             | 34.95, 42.75        | -2.08      | 0.34    |
|                            | Mexican-American | 32.81             | 30.89, 34.84        | 26.16             | 23.80, 28.75        | -6.65      | <0.01   |

<sup>a</sup> adjusted for age (1-year intervals)

<sup>b</sup> CI – confidence interval

Supplementary table 4. Difference in mean hormone concentrations comparing NHANES 1988-1991 to 1999-2004 by race/ethnicity and age, with adjustment for age only.

|                           |       | 1988-1991         |                     | 1999-2004         |                     | Difference | P-value |
|---------------------------|-------|-------------------|---------------------|-------------------|---------------------|------------|---------|
|                           |       | Mean <sup>a</sup> | 95% CI <sup>b</sup> | Mean <sup>a</sup> | 95% CI <sup>b</sup> |            |         |
| <b>White</b>              |       |                   |                     |                   |                     |            |         |
| Testosterone (ng/mL)      | 20-44 | 5.42              | 5.10, 5.74          | 4.76              | 4.36, 5.16          | -0.66      | <0.01   |
|                           | 45-69 | 5.41              | 5.12, 5.70          | 5.10              | 4.73, 5.46          | -0.31      | 0.09    |
|                           | ≥ 70  | 5.81              | 5.23, 6.38          | 5.53              | 4.91, 6.15          | -0.28      | 0.14    |
| Free testosterone (ng/mL) | 20-44 | 0.101             | 0.094, 0.108        | 0.097             | 0.091, 0.102        | -0.004     | 0.17    |
|                           | 45-69 | 0.101             | 0.091, 0.111        | 0.091             | 0.083, 0.100        | -0.009     | 0.09    |
|                           | ≥ 70  | 0.089             | 0.077, 0.103        | 0.073             | 0.058, 0.090        | -0.016     | 0.04    |
| SHBG (nmol/L)             | 20-44 | 35.62             | 32.86, 38.61        | 28.28             | 25.58, 31.26        | -7.34      | <0.01   |
|                           | 45-69 | 34.13             | 31.24, 37.29        | 33.69             | 30.30, 37.45        | -0.45      | 0.77    |
|                           | ≥ 70  | 41.73             | 34.76, 50.09        | 42.73             | 35.49, 51.45        | 1.00       | 0.67    |
| 3α-diol-G (ng/mL)         | 20-44 | 12.39             | 11.42, 13.45        | 9.57              | 8.73, 10.48         | -2.83      | <0.01   |
|                           | 45-69 | 11.69             | 10.45, 13.09        | 11.09             | 10.02, 12.28        | -0.60      | 0.40    |
|                           | ≥ 70  | 12.33             | 10.24, 14.85        | 11.25             | 9.43, 13.42         | -1.08      | 0.22    |
| Estradiol (pg/mL)         | 20-44 | 34.82             | 32.65, 37.14        | 28.59             | 26.16, 31.24        | -6.24      | <0.01   |
|                           | 45-69 | 35.23             | 31.99, 38.81        | 30.67             | 28.03, 33.55        | -4.57      | 0.01    |
|                           | ≥ 70  | 37.69             | 33.06, 42.97        | 28.33             | 24.00, 33.44        | -9.36      | <0.01   |
| <b>Black</b>              |       |                   |                     |                   |                     |            |         |
| Testosterone (ng/mL)      | 20-44 | 5.56              | 5.07, 6.05          | 5.95              | 5.41, 6.49          | 0.40       | 0.23    |
|                           | 45-69 | 6.17              | 5.66, 6.67          | 5.93              | 5.28, 6.58          | -0.24      | 0.55    |
|                           | ≥ 70  | 5.11              | 4.31, 5.91          | 6.43              | 4.22, 8.65          | 1.33       | 0.23    |
| Free testosterone (ng/mL) | 20-44 | 0.100             | 0.091, 0.110        | 0.111             | 0.099, 0.123        | 0.011      | 0.10    |
|                           | 45-69 | 0.110             | 0.099, 0.122        | 0.101             | 0.089, 0.113        | -0.009     | 0.23    |
|                           | ≥ 70  | 0.074             | 0.054, 0.102        | 0.094             | 0.064, 0.139        | 0.020      | 0.32    |
| SHBG (nmol/L)             | 20-44 | 35.79             | 32.93, 38.91        | 34.82             | 31.23, 38.82        | -0.97      | 0.64    |
|                           | 45-69 | 39.37             | 35.27, 43.94        | 36.26             | 30.93, 42.51        | -3.11      | 0.34    |

|                           |       |       |              |       |              |        |       |
|---------------------------|-------|-------|--------------|-------|--------------|--------|-------|
|                           | ≥ 70  | 36.77 | 30.05, 45.00 | 35.73 | 27.35, 46.68 | -1.04  | 0.82  |
| 3α-diol-G (ng/mL)         | 20-44 | 10.50 | 9.35, 11.79  | 9.83  | 9.03, 10.70  | -0.67  | 0.29  |
|                           | 45-69 | 10.02 | 8.04, 12.49  | 9.81  | 8.74, 11.02  | -0.21  | 0.85  |
|                           | ≥ 70  | 9.44  | 6.84, 13.02  | 12.79 | 7.20, 22.73  | 3.35   | 0.30  |
| Estradiol (pg/mL)         | 20-44 | 40.59 | 38.11, 43.22 | 38.73 | 34.34, 43.68 | -1.85  | 0.47  |
|                           | 45-69 | 40.50 | 37.45, 43.81 | 37.70 | 31.55, 45.05 | -2.80  | 0.42  |
|                           | ≥ 70  | 41.33 | 34.66, 49.27 | 41.83 | 30.17, 57.99 | 0.51   | 0.94  |
| <u>Mexican-American</u>   |       |       |              |       |              |        |       |
| Testosterone (ng/mL)      | 20-44 | 5.25  | 5.01, 5.50   | 4.84  | 4.39, 5.30   | -0.41  | 0.05  |
|                           | 45-69 | 5.13  | 4.73, 5.52   | 5.05  | 4.29, 5.81   | -0.08  | 0.85  |
|                           | ≥ 70  | 6.04  | 5.05, 7.03   | 6.07  | 5.35, 6.80   | 0.03   | 0.95  |
| Free testosterone (ng/mL) | 20-44 | 0.102 | 0.097, 0.108 | 0.097 | 0.089, 0.106 | -0.005 | 0.21  |
|                           | 45-69 | 0.094 | 0.086, 0.102 | 0.086 | 0.074, 0.099 | -0.008 | 0.25  |
|                           | ≥ 70  | 0.108 | 0.092, 0.128 | 0.103 | 0.088, 0.120 | -0.006 | 0.56  |
| SHBG (nmol/L)             | 20-44 | 31.92 | 29.44, 34.61 | 30.94 | 27.39, 34.94 | -0.98  | 0.61  |
|                           | 45-69 | 34.32 | 31.77, 37.06 | 34.62 | 28.68, 41.79 | 0.31   | 0.93  |
|                           | ≥ 70  | 36.55 | 29.70, 44.98 | 38.30 | 31.75, 46.18 | 1.75   | 0.68  |
| 3α-diol-G (ng/mL)         | 20-44 | 10.98 | 9.89, 12.20  | 9.40  | 8.48, 10.42  | -1.58  | 0.02  |
|                           | 45-69 | 9.94  | 8.64, 11.44  | 9.61  | 8.53, 10.82  | -0.34  | 0.70  |
|                           | ≥ 70  | 14.36 | 9.96, 20.70  | 12.01 | 10.30, 14.00 | -2.35  | 0.34  |
| Estradiol (pg/mL)         | 20-44 | 32.51 | 30.01, 35.23 | 25.76 | 23.07, 28.76 | -6.76  | <0.01 |
|                           | 45-69 | 32.29 | 29.64, 35.17 | 26.60 | 23.17, 30.54 | -5.69  | 0.01  |
|                           | ≥ 70  | 37.09 | 31.04, 44.33 | 27.72 | 22.75, 33.77 | -9.38  | 0.01  |

<sup>a</sup> adjusted for age (1-year intervals)

<sup>b</sup> CI – confidence interval

Supplementary table 5. Difference in NHANES 1988-1991 and 1999-2004 mean hormone concentrations among white men ages 20-44 years, restricting to subjects with BMI within the 5<sup>th</sup> and 95<sup>th</sup> percentiles<sup>a</sup>.

|                            | Difference <sup>b, c</sup> | P-value |
|----------------------------|----------------------------|---------|
| Testosterone (ng/mL)       | -0.15                      | 0.38    |
| Free testosterone (ng/mL)  | -0.002                     | 0.70    |
| SHBG (nmol/L)              | -2.20                      | 0.10    |
| 3 $\alpha$ -diol-G (ng/mL) | -3.45                      | < 0.01  |
| Estradiol (pg/mL)          | -7.08                      | < 0.01  |

<sup>a</sup> BMI greater than 20.4 kg/m<sup>2</sup> and less than 36.6 kg/m<sup>2</sup>

<sup>b</sup> adjusted for age (1-year intervals), BMI, waist circumference, smoking, and alcohol use

<sup>c</sup> differences for free testosterone, SHBG, 3 $\alpha$ -diol-G, and estradiol were calculated from geometric means

Supplementary table 6. Difference in NHANES 1988-1991 and 1999-2004 mean hormone concentrations among black men, restricting to subjects with BMI within the 5<sup>th</sup> and 95<sup>th</sup> percentiles<sup>a</sup>.

|                            | Difference <sup>b, c</sup> | P-value |
|----------------------------|----------------------------|---------|
| Testosterone (ng/mL)       | 0.60                       | 0.02    |
| Free testosterone (ng/mL)  | 0.012                      | 0.08    |
| SHBG (nmol/L)              | 0.42                       | 0.81    |
| 3 $\alpha$ -diol-G (ng/mL) | -0.74                      | 0.18    |
| Estradiol (pg/mL)          | -1.07                      | 0.67    |

<sup>a</sup> BMI greater than 19.2 kg/m<sup>2</sup> and less than 37.6 kg/m<sup>2</sup>

<sup>b</sup> adjusted for age (1-year intervals), BMI, waist circumference, smoking, and alcohol use

<sup>c</sup> differences for free testosterone, SHBG, 3 $\alpha$ -diol-G, and estradiol were calculated from geometric means
